# Supplementary material for: Crystallisation, thermal analysis and acetal protection activity of new layered Zn(ii) hybrid polymorphs
Source: Royal Society of Chemistry journal article supplement (doi:10.1039/c6ce00486e), 2016-01-01

## Electronic Supplementary Information 2 (ESI)

# Crystallisation, thermal analysis and acetal protection activity of new layered Zn(II) hybrid polymorphs

Salem Saïd,<sup>a</sup> Houcine Naïli<sup>a\*</sup>, Thierry Bataille<sup>b</sup> and Raquel P. Herrera<sup>c</sup>

<sup>a</sup> *Laboratoire Physico-chimie de l'Etat Solide, Département de Chimie, Faculté des Sciences de Sfax, B.P. 1171, 3000 Sfax, Université de Sfax, Tunisie. E-mail address: [houcine\\_naïli@yahoo.com](mailto:houcine_naïli@yahoo.com)*

<sup>b</sup> *Laboratorio de Organocatálisis Asimétrica, Departamento de Química Orgánica, Instituto de Síntesis Química y Catálisis Homogénea (ISQCH), CSIC-Universidad de Zaragoza, C/Pedro Cerbuna 12, E-50009 Zaragoza, Spain.*

**Figure S1.**  $^1\text{H}$  and  $^{13}\text{C}$ -APT NMR spectra ( $\text{CDCl}_3$ ) of compound **4a**.

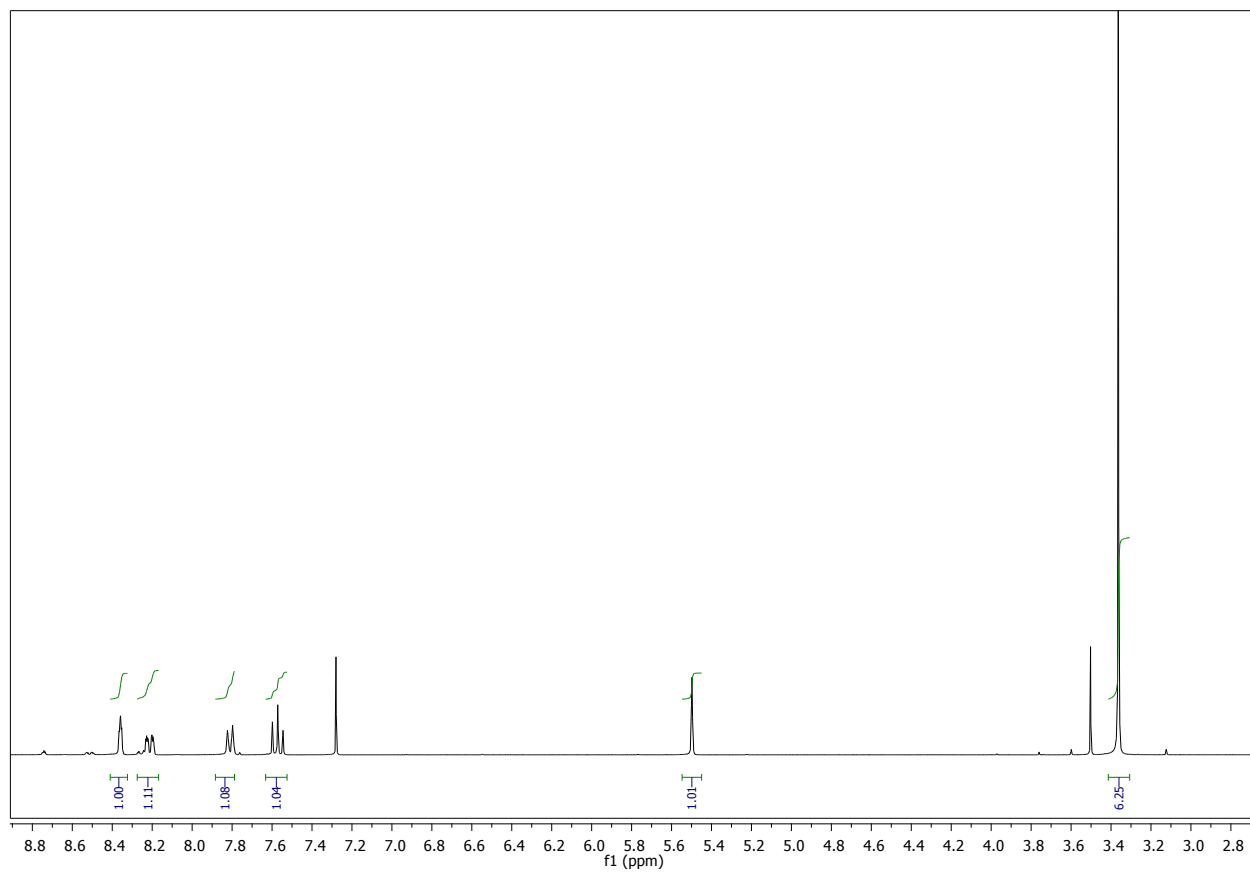

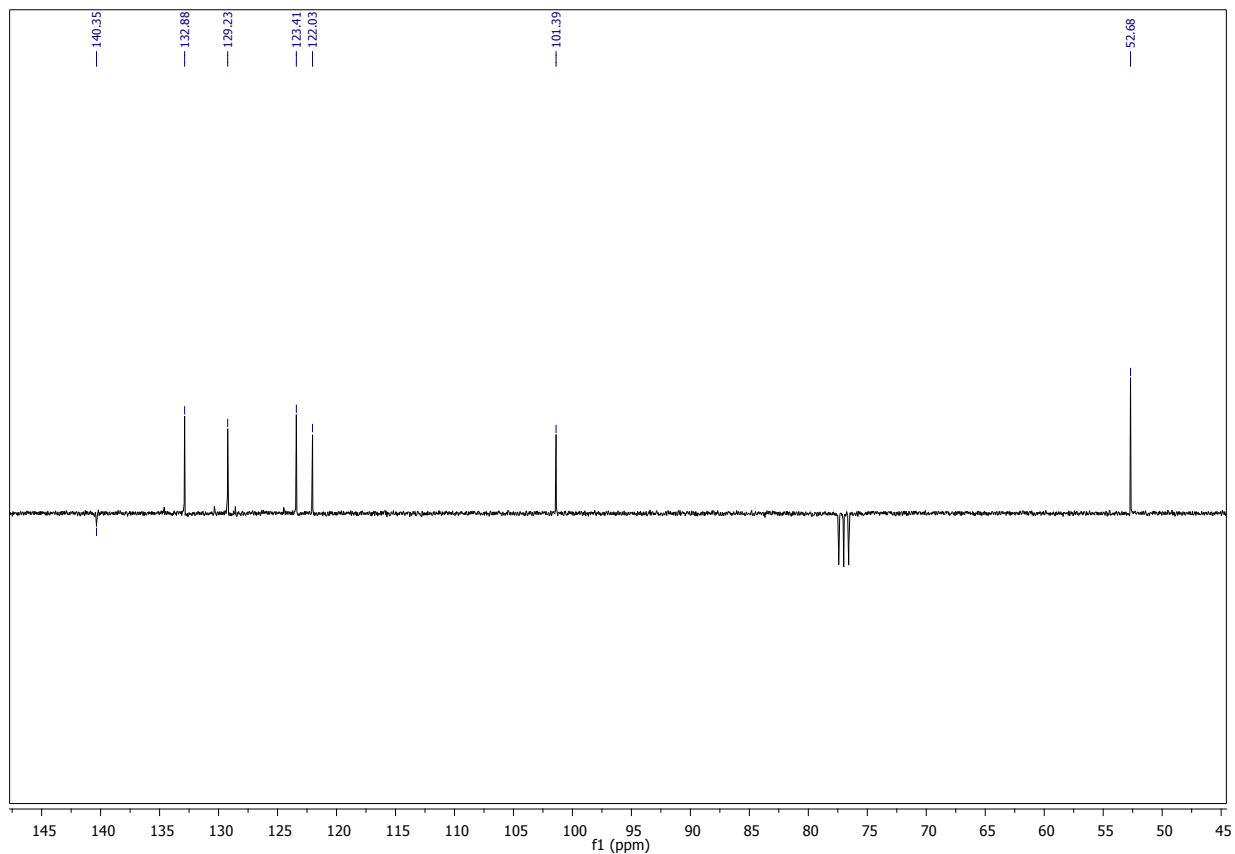

**Figure S2.**  $^1\text{H}$  and  $^{13}\text{C}$ -APT NMR spectra ( $\text{CDCl}_3$ ) of compound **4b**.

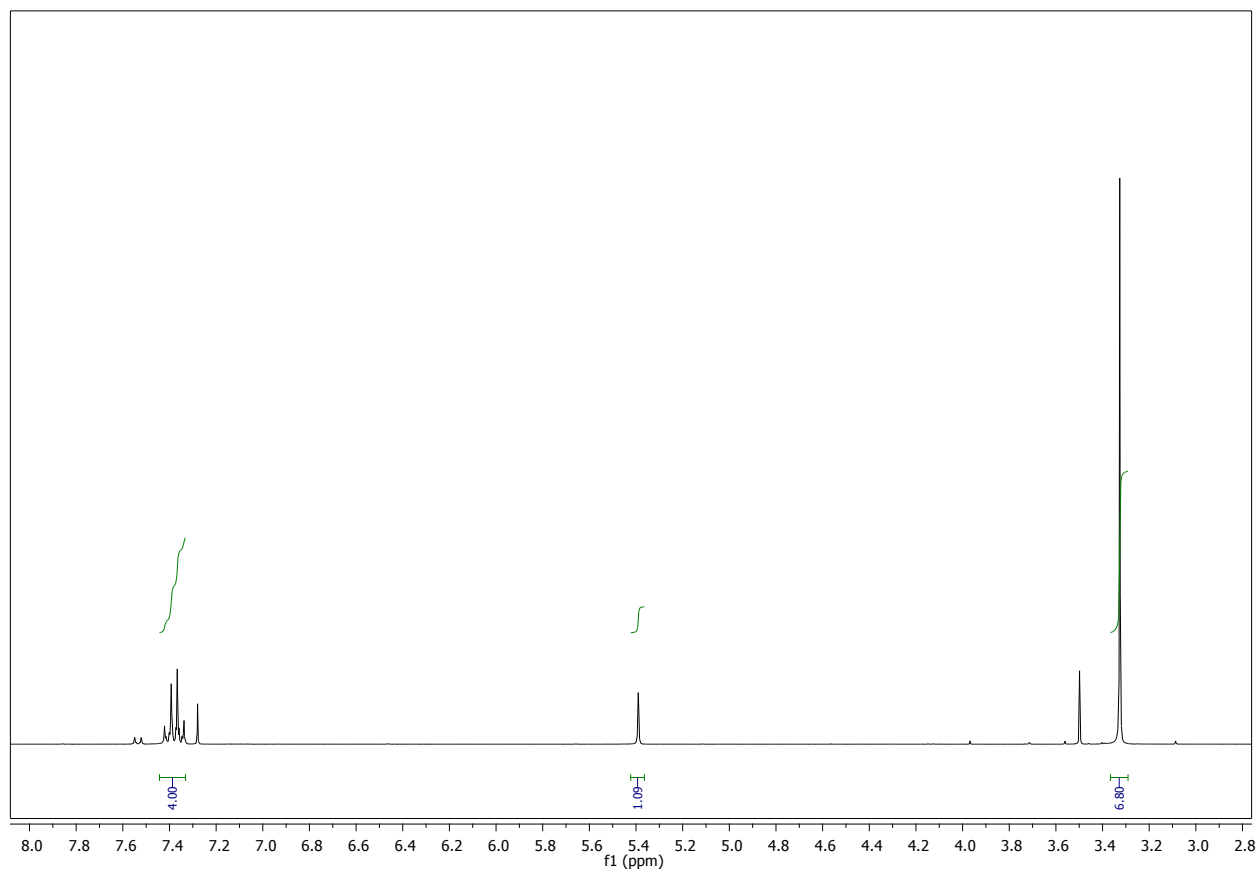

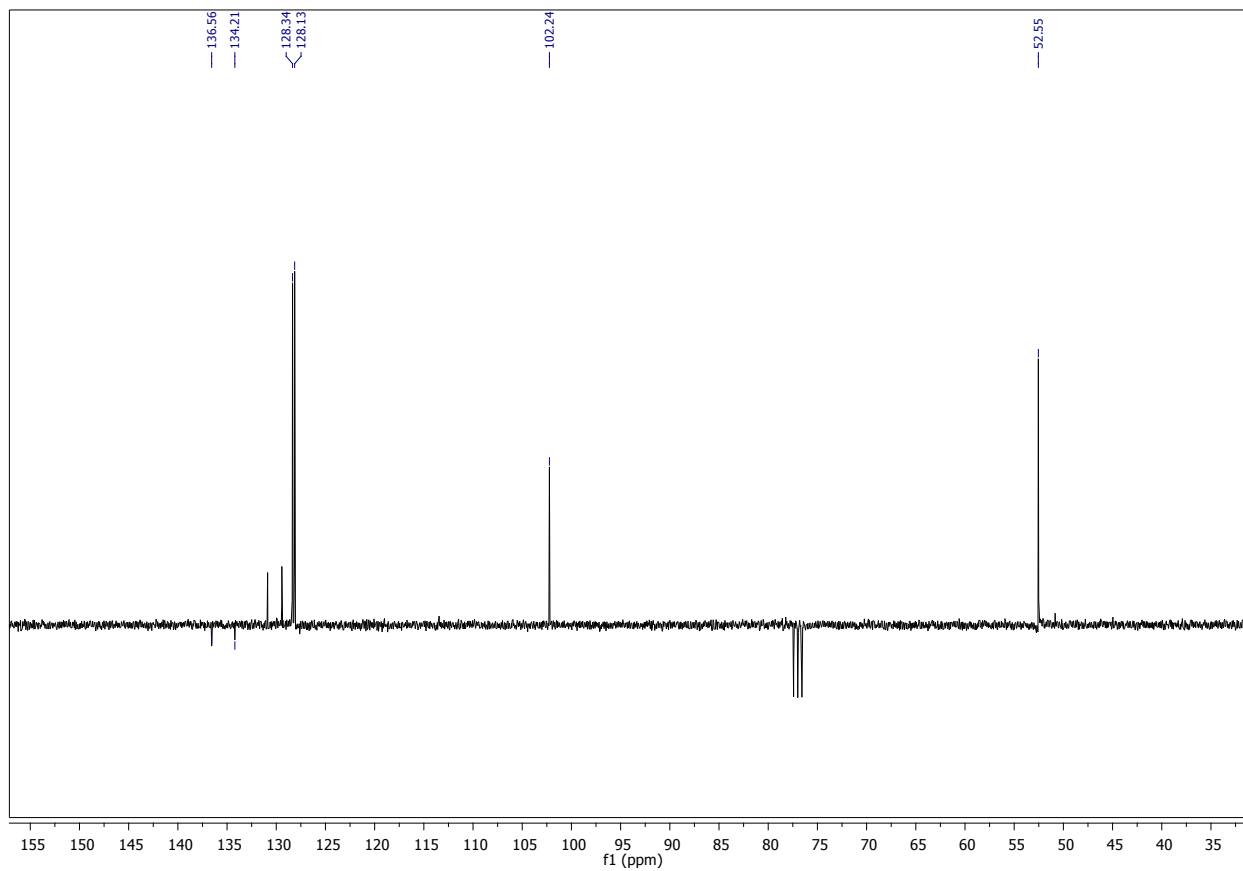

**Figure S3.**  $^1\text{H}$  and  $^{13}\text{C}$ -APT NMR spectra ( $\text{CD}_2\text{Cl}_2$ ) of compound **4c**.

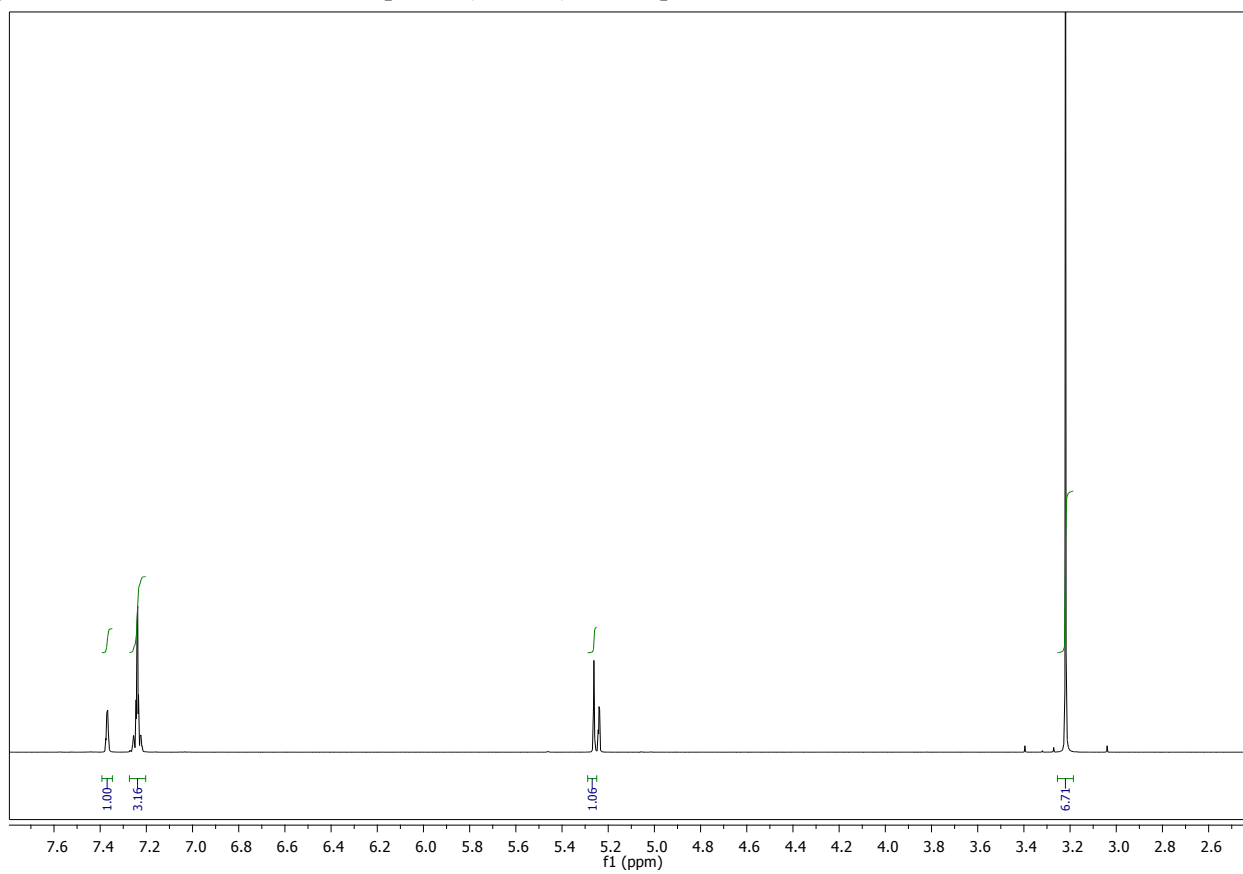

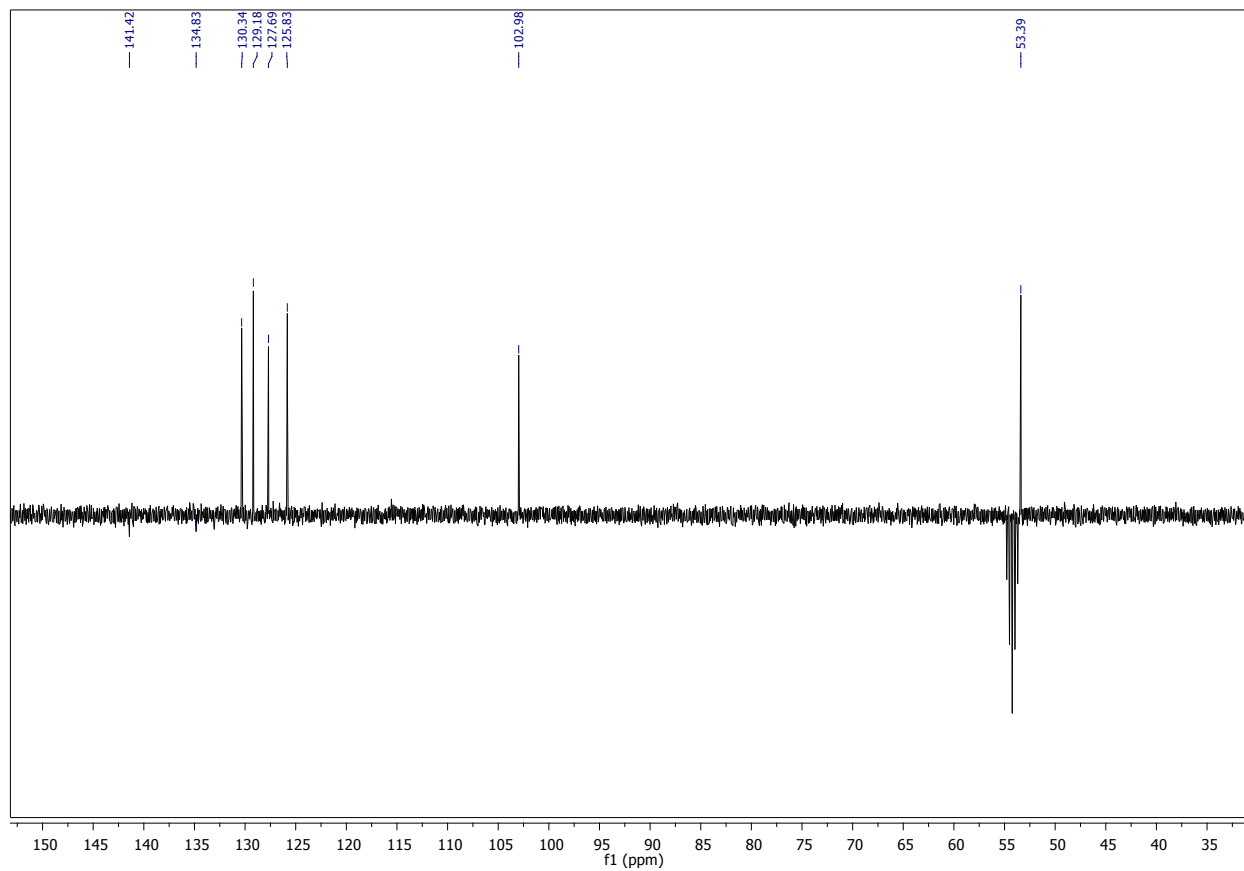

**Figure S4.** <sup>1</sup>H and <sup>13</sup>C-APT NMR spectra (CD<sub>2</sub>Cl<sub>2</sub>) of compound **4d**.

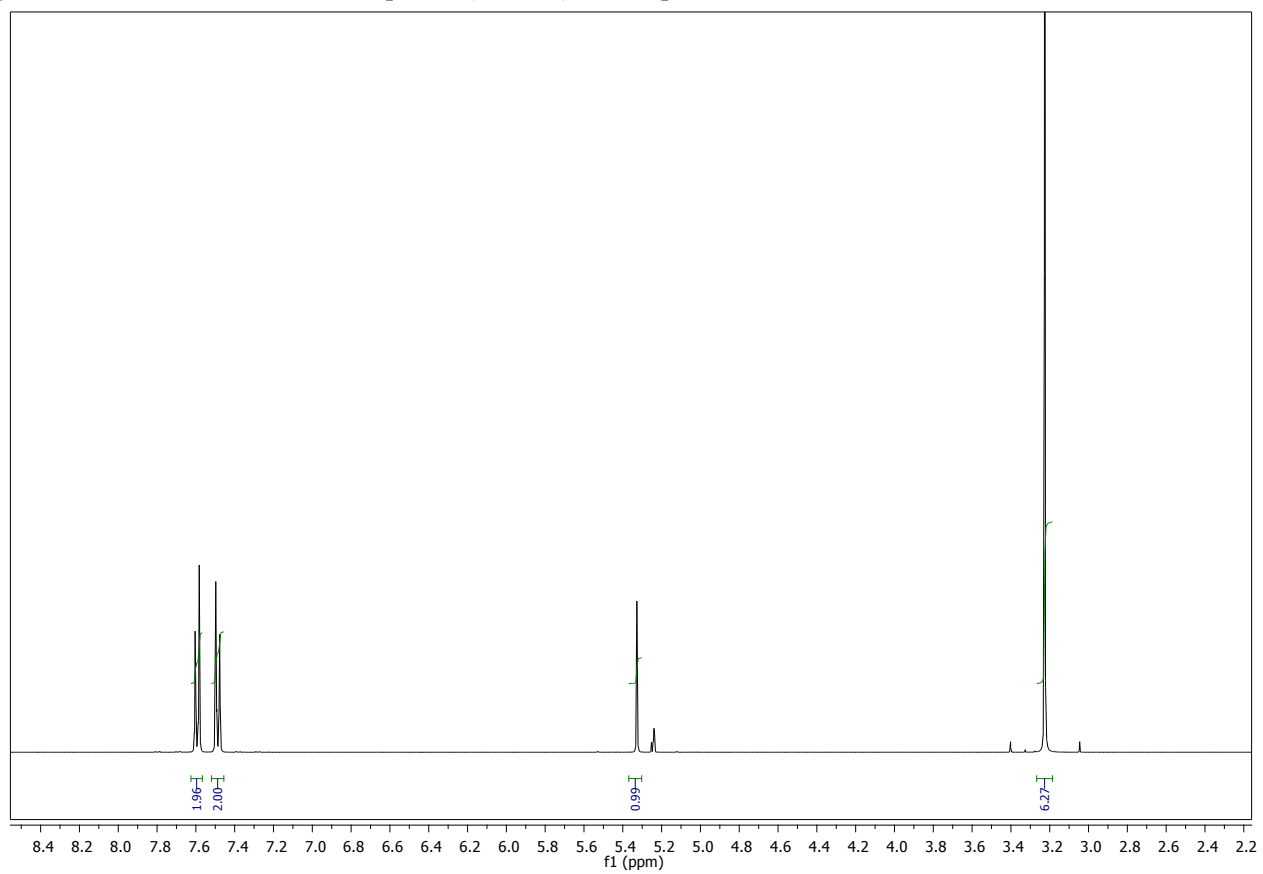

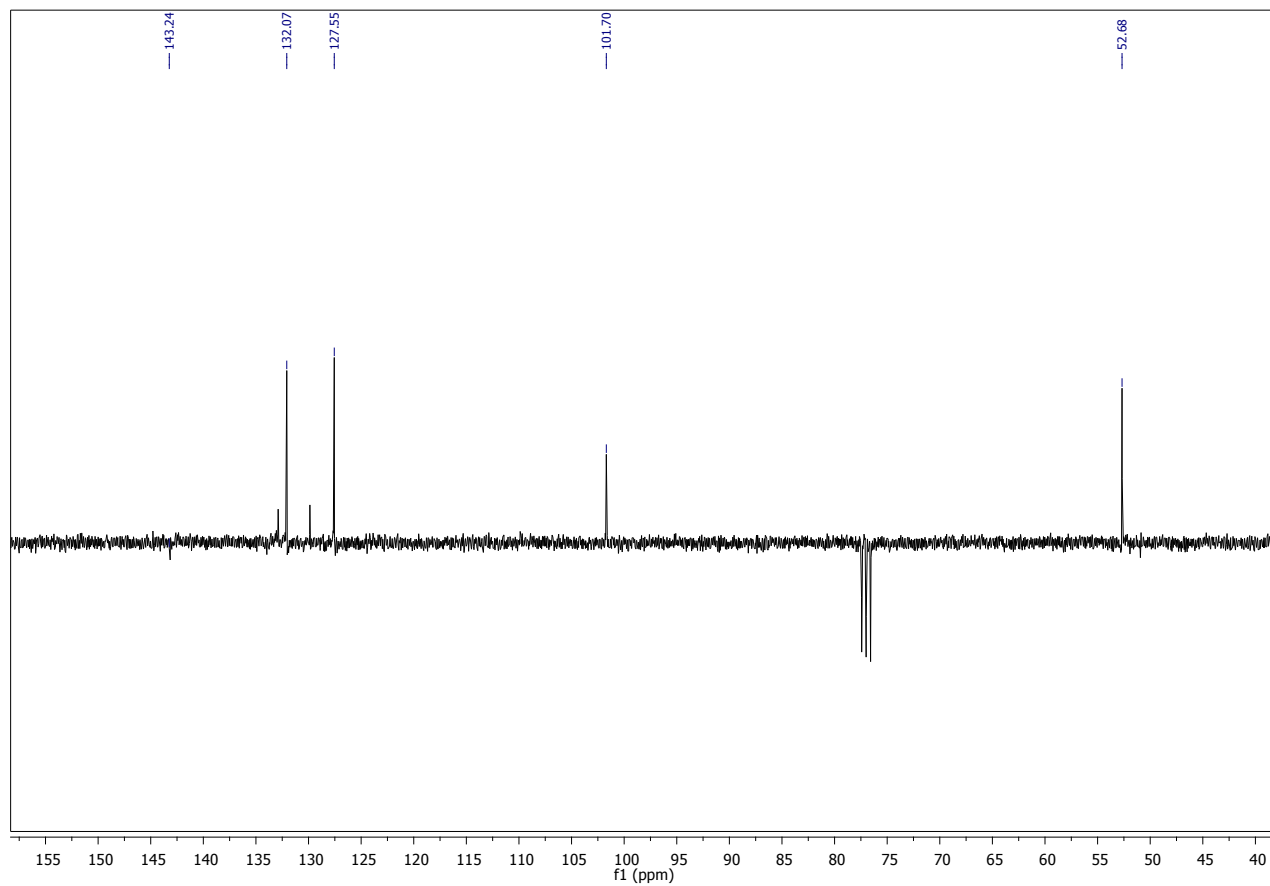

**Figure S5.**  $^1\text{H}$  and  $^{13}\text{C}$ -APT NMR spectra ( $\text{CDCl}_3$ ) of compound **4e**.

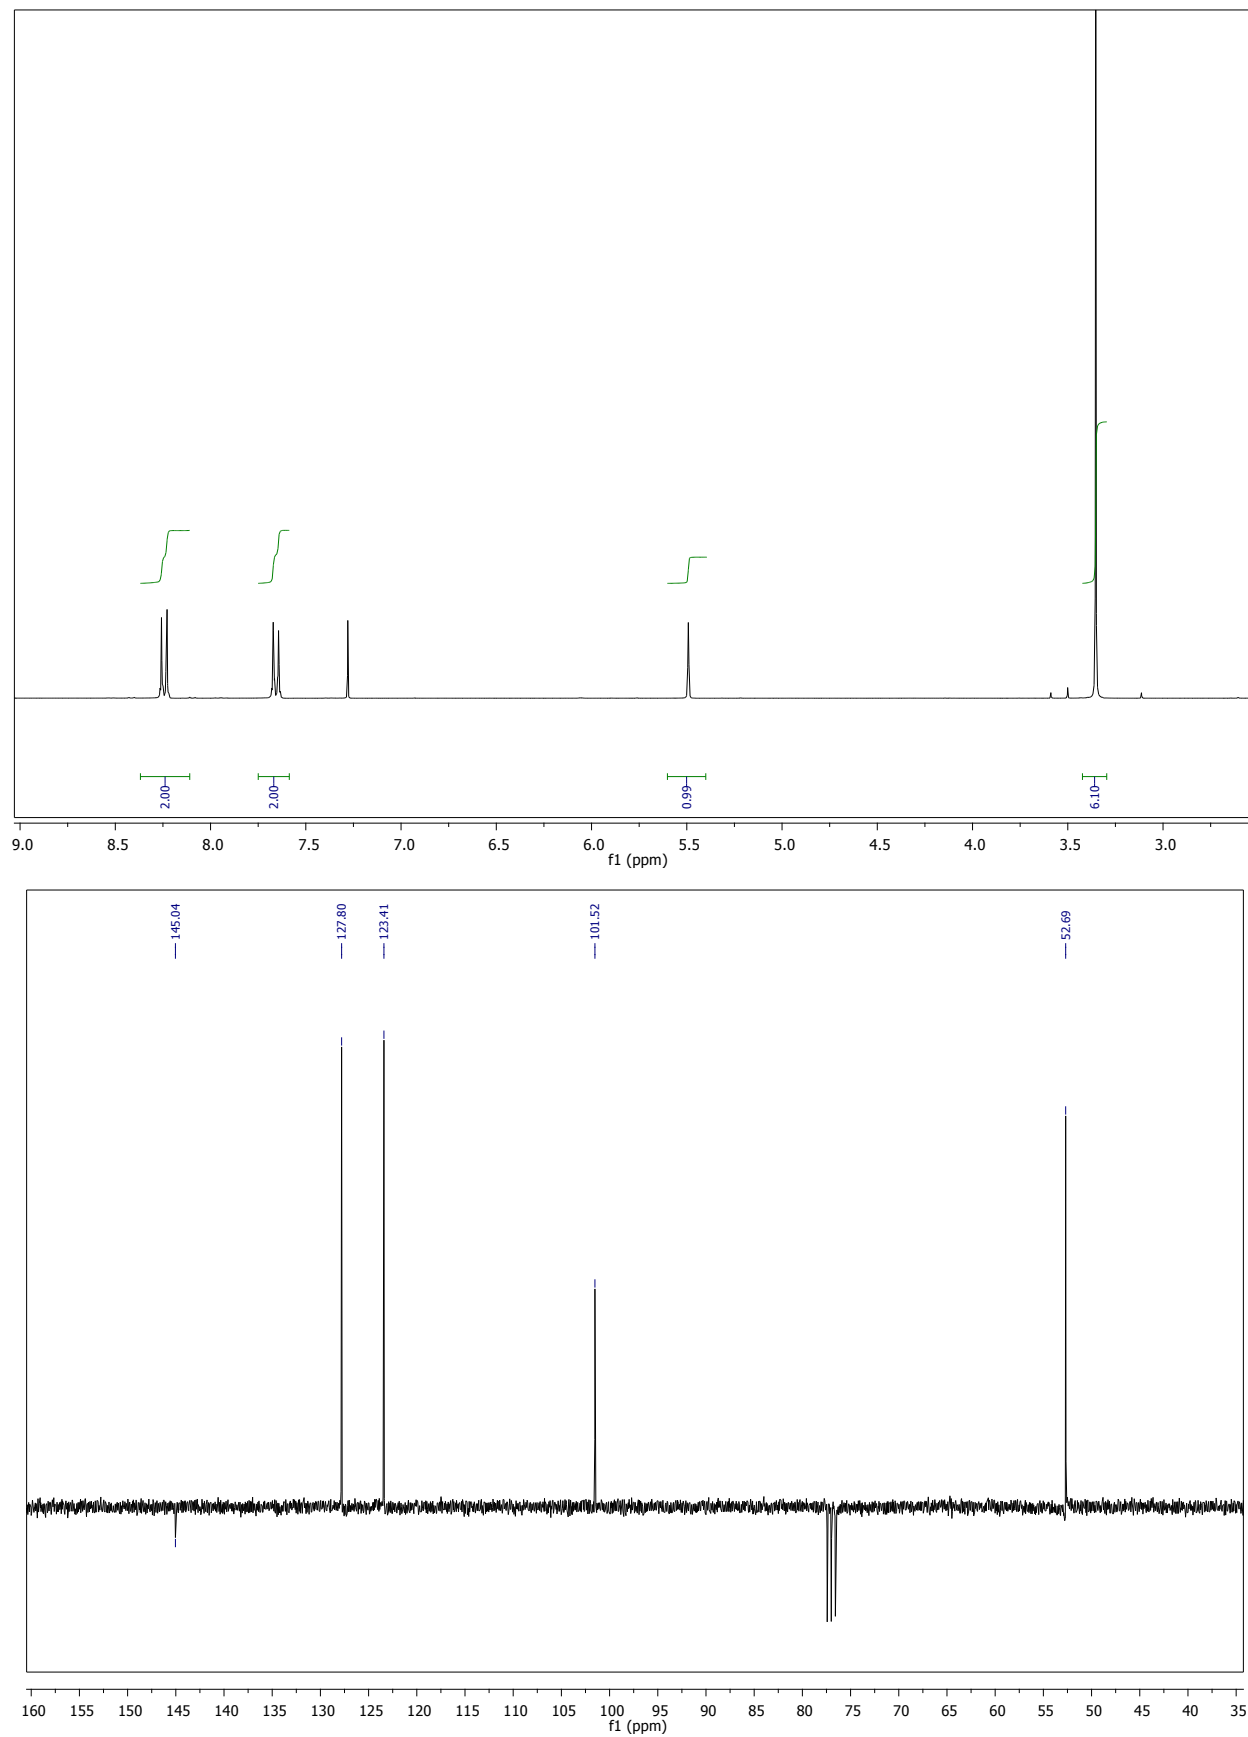

**Figure S6.**  $^1\text{H}$  and  $^{13}\text{C}$ -APT NMR spectra ( $\text{CDCl}_3$ ) of compound **4f**.

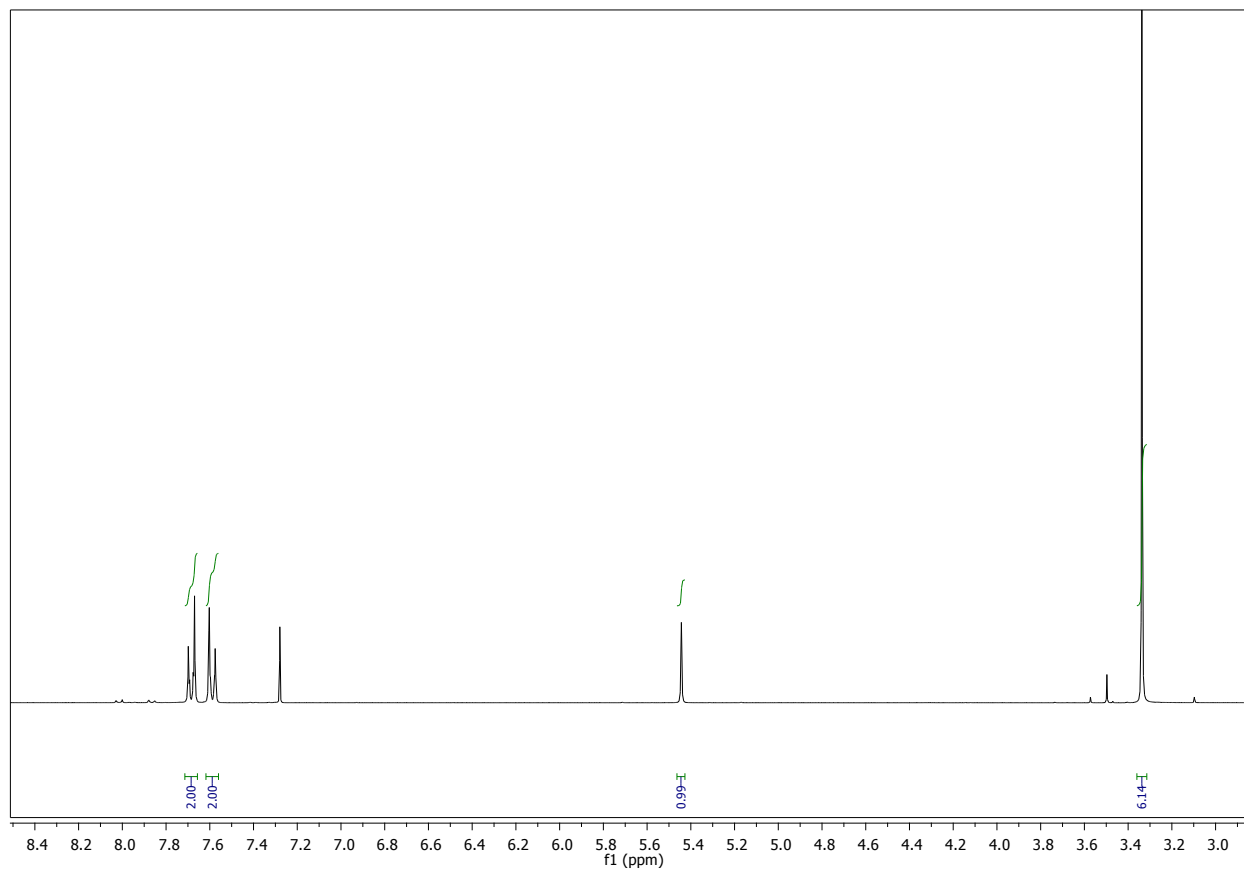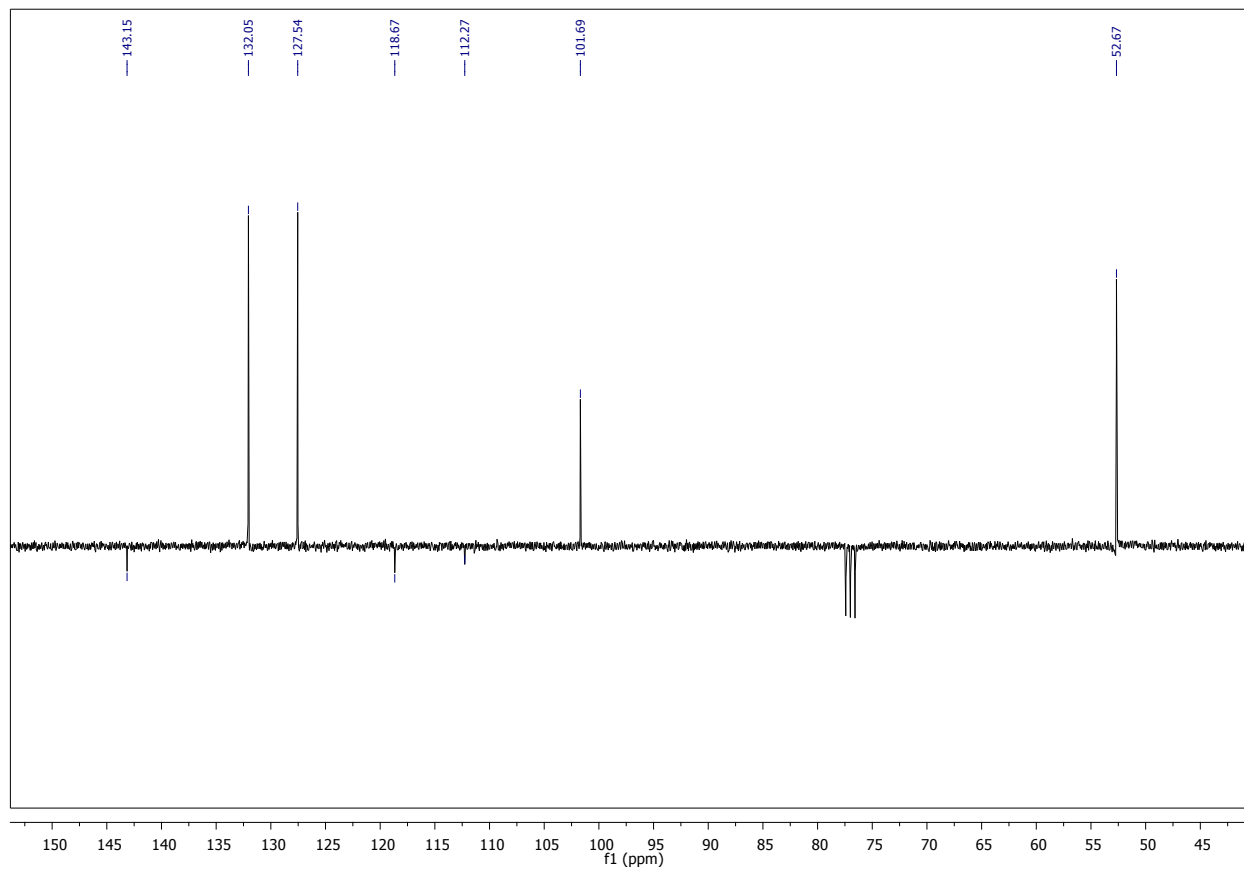

**Figure S7.**  $^1\text{H}$  and  $^{13}\text{C}$ -APT NMR spectra ( $\text{CD}_2\text{Cl}_2$ ) of compound **4g**.



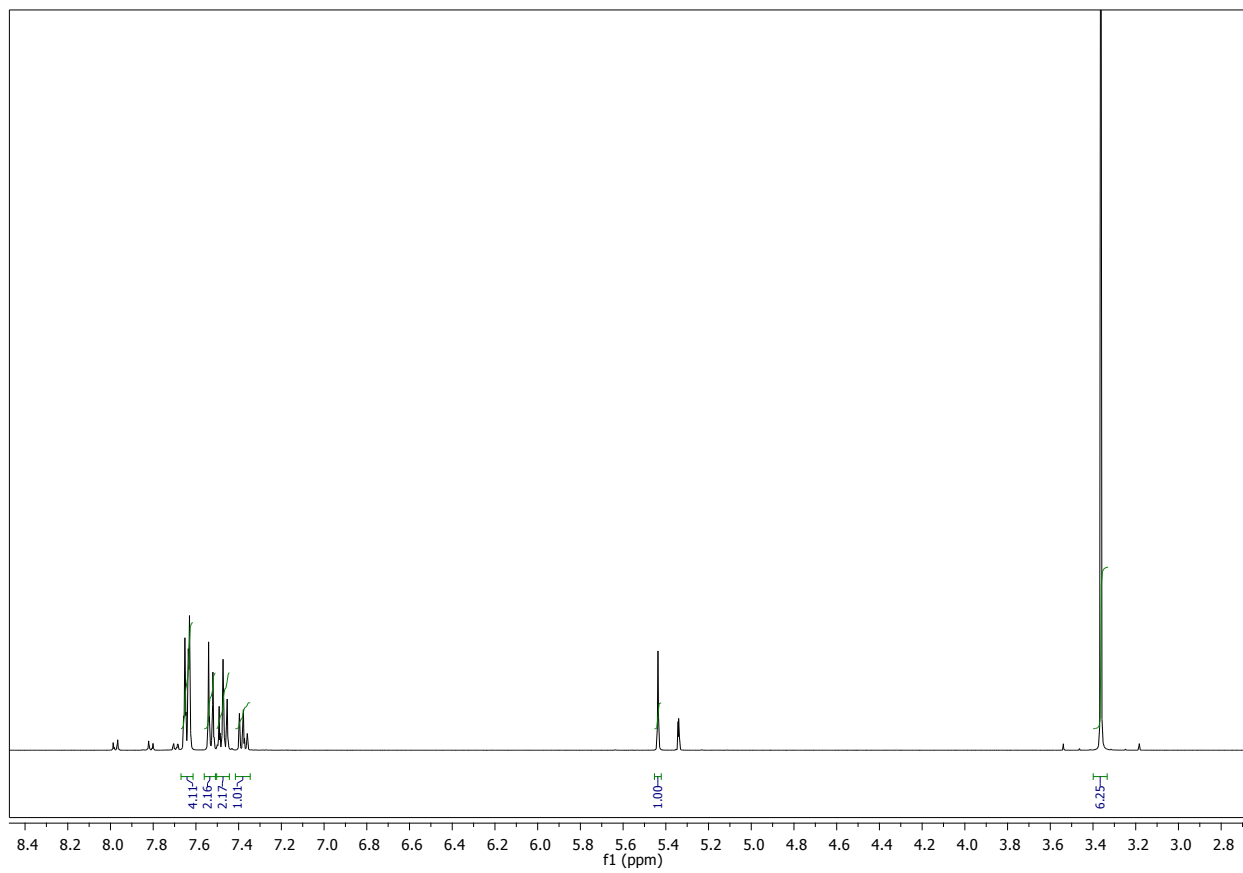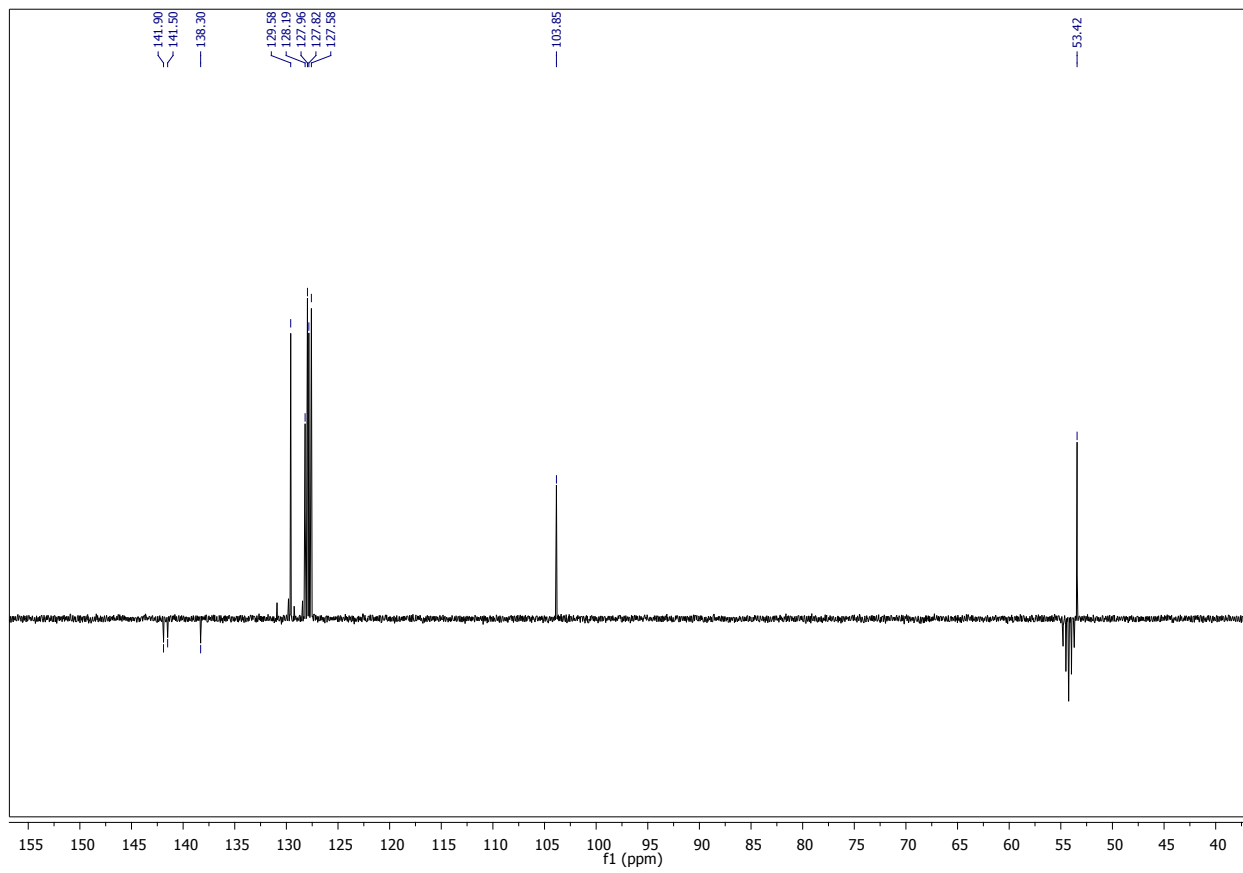

Figure S8.  $^1\text{H}$  and  $^{13}\text{C}$ -APT NMR spectra ( $\text{CD}_2\text{Cl}_2$ ) of compound **4i**.

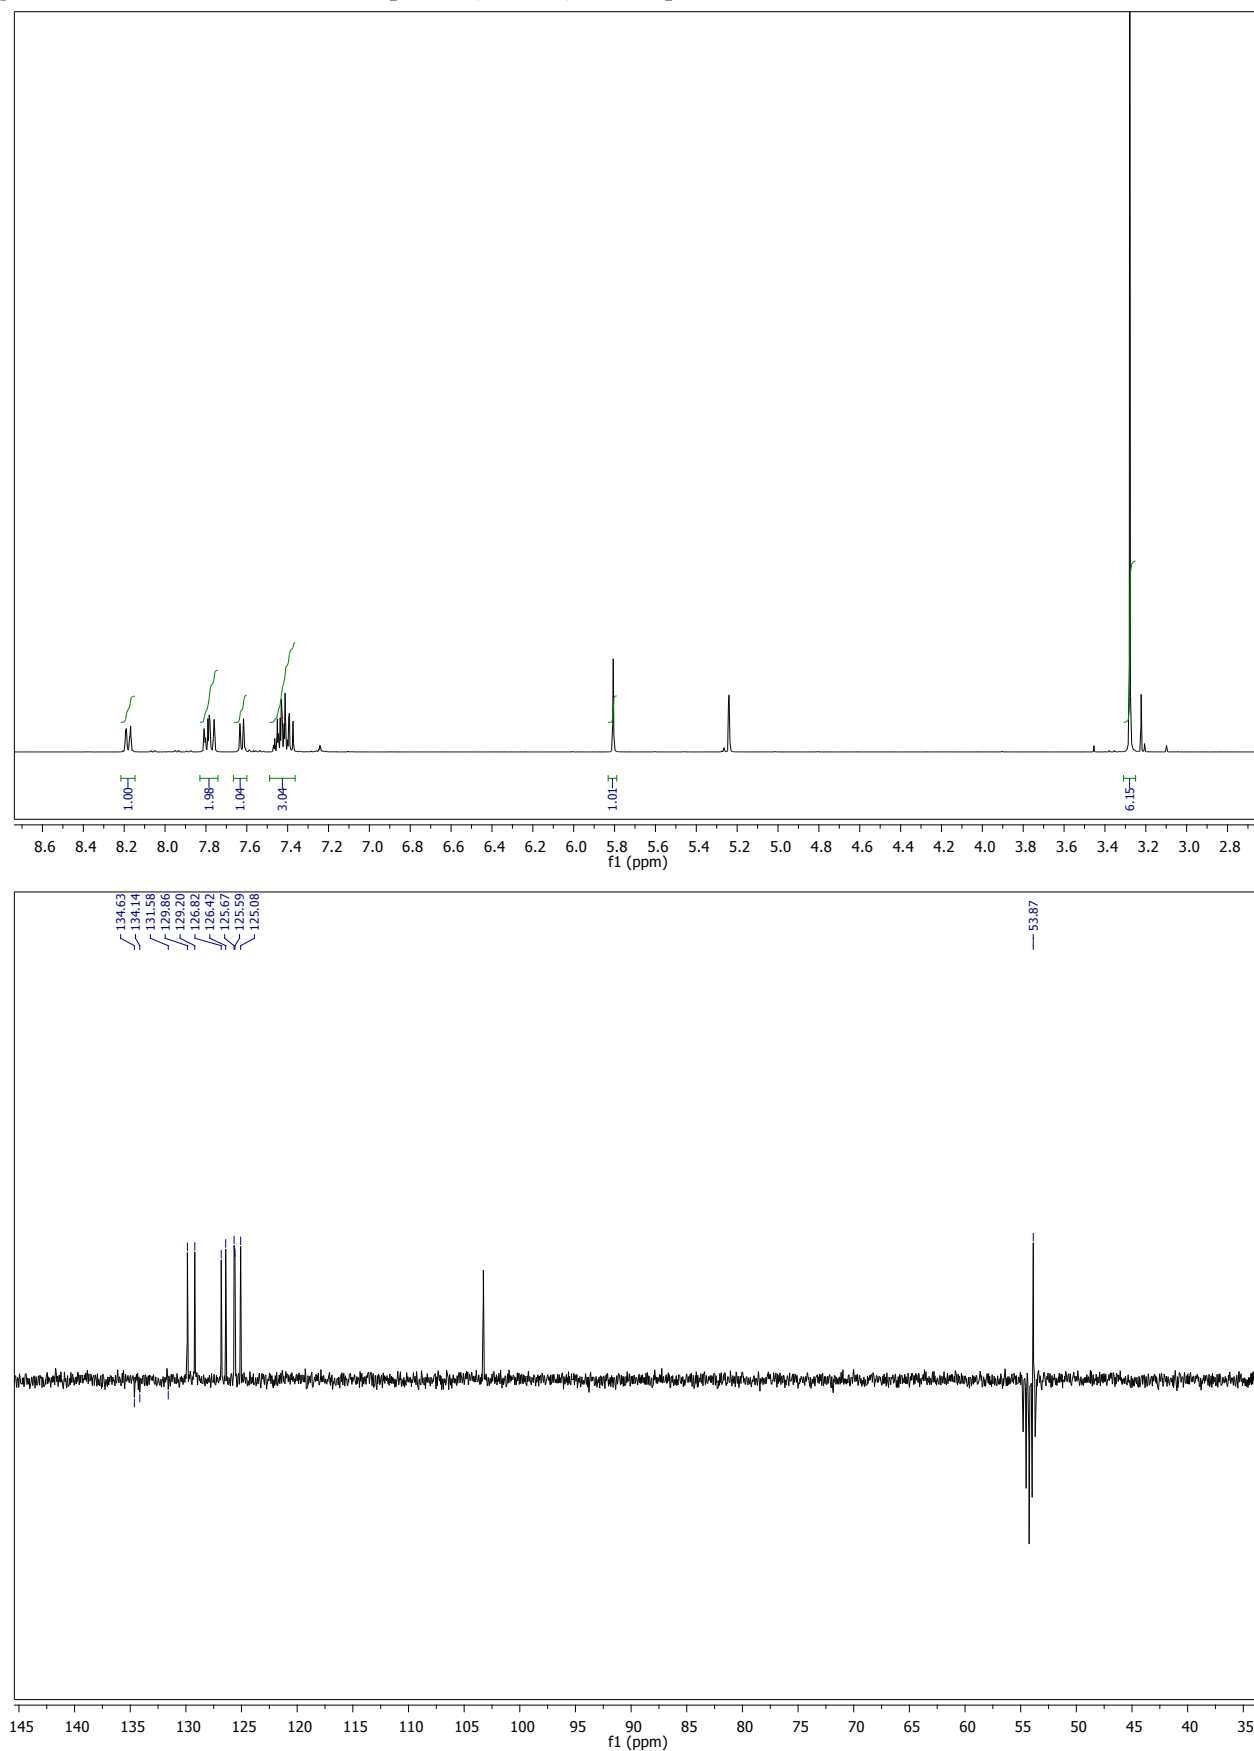

Supplement: c6ce00486e2.pdf [file c6ce00486e2.pdf]
