# Supplementary material for: Crystallisation, thermal analysis and acetal protection activity of new layered Zn(ii) hybrid polymorphs
Source: Royal Society of Chemistry journal article supplement (doi:10.1039/c6ce00486e), 2016-01-01
Supplement: c6ce00486e1.pdf [file c6ce00486e1.pdf]

## Electronic Supplementary Information 1 (ESI)

# Crystallisation, thermal analysis and acetal protection activity of new layered Zn(II) hybrid polymorphs

Salem Saïd,<sup>a</sup> Houcine Naili<sup>a\*</sup>, Thierry Bataille<sup>b</sup> and Raquel P. Herrera<sup>c</sup>

<sup>a</sup> *Laboratoire Physico-chimie de l'Etat Solide, Département de Chimie, Faculté des Sciences de Sfax, B.P. 1171, 3000 Sfax, Université de Sfax, Tunisie. E-mail address: [houcine\\_naili@yahoo.com](mailto:houcine_naili@yahoo.com)*

<sup>b</sup> *Laboratorio de Organocatálisis Asimétrica, Departamento de Química Orgánica, Instituto de Síntesis Química y Catálisis Homogénea (ISQCH), CSIC-Universidad de Zaragoza, C/Pedro Cerbuna 12, E-50009 Zaragoza, Spain.*

**Figure S1.** Selected bond distances (Å) and angles (°) in polymorph 1

| Octahedron around Zn                     |            | Tetrahedron around S1 and S2 |            | Within the organic moieties |            |
|------------------------------------------|------------|------------------------------|------------|-----------------------------|------------|
| Zn1-OW1                                  | 2.0823(3)  | S1-O1                        | 1.4957(3)  | N1A-C2A                     | 1.3521(2)  |
| Zn1-OW1 <sup>i</sup>                     | 2.0823(3)  | S1-O2                        | 1.4929(2)  | N1A-C6A                     | 1.3703(2)  |
| Zn1-OW2                                  | 2.0874(5)  | S1-O3                        | 1.4656(5)  | N2A-C2A                     | 1.3353(2)  |
| Zn1-OW2 <sup>i</sup>                     | 2.0874(5)  | S1-O4                        | 1.4666(3)  | C2A-C3A                     | 1.4099(2)  |
| Zn1-OW3                                  | 2.1119(3)  | O2-S1-O1                     | 107.223(8) | C3A-C4A                     | 1.3695(2)  |
| Zn1-OW3 <sup>i</sup>                     | 2.1119(3)  | O4-S1-O1                     | 109.057(7) | C4A-C5A                     | 1.4078(2)  |
| Zn2-OW4                                  | 2.0742(3)  | O3-S1-O1                     | 109.802(8) | C5A-C6A                     | 1.3641(2)  |
| Zn2-OW4 <sup>ii</sup>                    | 2.0742(3)  | O4-S1-O2                     | 110.652(1) | C6A-C7A                     | 1.4911(1)  |
| Zn2-OW5                                  | 2.0765(3)  | O3-S1-O2                     | 109.517(9) | C2A-N1A-C6A                 | 123.382(1) |
| Zn2-OW5 <sup>ii</sup>                    | 2.0765(3)  | O3-S1-O4                     | 110.528(9) | N2A-C2A-N1A                 | 118.838(1) |
| Zn2-OW6                                  | 2.0852(6)  | S2-O5                        | 1.4771(2)  | N2A-C2A-C3A                 | 123.004(1) |
| Zn2-OW6 <sup>ii</sup>                    | 2.0852(6)  | S2-O6                        | 1.4838(2)  | N1A-C2A-C3A                 | 118.158(1) |
| OW1 <sup>i</sup> -Zn1-OW1                | 179.986(4) | S2-O7                        | 1.4876(3)  | C4A-C3A-C2A                 | 119.20(1)  |
| OW1 <sup>i</sup> -Zn1-OW2 <sup>i</sup>   | 90.401(5)  | S2-O8                        | 1.4662(8)  | C3A-C4A-C5A                 | 121.013(1) |
| OW1-Zn1-OW2                              | 89.599(5)  | O8-S2-O5                     | 110.527(8) | C6A-C5A-C4A                 | 118.923(1) |
| OW1-Zn1-OW2 <sup>i</sup>                 | 90.401(5)  | O8-S2-O6                     | 109.820(9) | C5A-C6A-N1A                 | 119.313(1) |
| OW2-Zn1-OW2 <sup>i</sup>                 | 179.993(6) | O5-S2-O6                     | 110.652(1) | C5A-C6A-C7A                 | 124.486(1) |
| OW1 <sup>i</sup> -Zn1-OW3                | 89.574(5)  | O8-S2-O7                     | 109.327(9) | N1A-C6A-C7A                 | 116.201(1) |
| OW1-Zn1-OW3                              | 90.426(5)  | O5-S2-O7                     | 108.754(7) | N1B-C2B                     | 1.3524(2)  |
| OW2-Zn1-OW3                              | 88.424(6)  | O6-S2-O7                     | 109.919(9) | N1B-C6B                     | 1.3668(2)  |
| OW2 <sup>i</sup> -Zn1-OW3                | 91.576(6)  |                              |            | N2B-C2B                     | 1.3372(2)  |
| OW1 <sup>i</sup> -Zn1-OW3 <sup>i</sup>   | 90.426(5)  |                              |            | C2B-C3B                     | 1.4107(2)  |
| OW1-Zn1-OW3 <sup>i</sup>                 | 89.574(5)  |                              |            | C3B-C4B                     | 1.3688(2)  |
| OW2-Zn1-OW3 <sup>i</sup>                 | 91.576(6)  |                              |            | C4B-C5B                     | 1.4108(2)  |
| OW2 <sup>i</sup> -Zn1-OW3 <sup>i</sup>   | 88.424(6)  |                              |            | C5B-C6B                     | 1.3658(2)  |
| OW3-Zn1-OW3 <sup>i</sup>                 | 179.996(6) |                              |            | C6B-C7B                     | 1.4962(1)  |
| OW4 <sup>ii</sup> -Zn2-OW4               | 179.984(6) |                              |            | C2B-N1B-C6B                 | 123.570(1) |
| OW4 <sup>ii</sup> -Zn2-OW5               | 87.917(5)  |                              |            | N2B-C2B-N1B                 | 118.769(1) |
| OW4-Zn2-OW5                              | 92.083(5)  |                              |            | N2B-C2B-C3B                 | 122.993(1) |
| OW4 <sup>ii</sup> -Zn2-OW5 <sup>ii</sup> | 92.083(5)  |                              |            | N1B-C2B-C3B                 | 118.238(1) |
| OW4-Zn2-OW5 <sup>ii</sup>                | 87.917(5)  |                              |            | C4B-C3B-C2B                 | 118.998(1) |
| OW5-Zn2-OW5 <sup>ii</sup>                | 179.987(6) |                              |            | C3B-C4B-C5B                 | 121.118(2) |
| OW4 <sup>ii</sup> -Zn2-OW6 <sup>ii</sup> | 90.933(6)  |                              |            | C6B-C5B-C4B                 | 118.859(2) |
| OW4-Zn2-OW6 <sup>ii</sup>                | 89.067(6)  |                              |            | C5B-C6B-N1B                 | 119.209(1) |
| OW5-Zn2-OW6 <sup>ii</sup>                | 93.756(5)  |                              |            | C5B-C6B-C7B                 | 124.459(1) |
| OW5 <sup>ii</sup> -Zn2-OW6 <sup>ii</sup> | 86.244(5)  |                              |            | N1B-C6B-C7B                 | 116.332(1) |
| OW4 <sup>ii</sup> -Zn2-OW6               | 89.067(6)  |                              |            |                             |            |
| OW4-Zn2-OW6                              | 90.933(6)  |                              |            |                             |            |
| OW5-Zn2-OW6                              | 86.244(5)  |                              |            |                             |            |
| OW5 <sup>ii</sup> -Zn2-OW6               | 93.756(5)  |                              |            |                             |            |
| OW6 <sup>ii</sup> -Zn2-OW6               | 179.991(6) |                              |            |                             |            |

symmetry code: i = 1-x, 1-y, 1-z, ii = -x, 1-y, -z

**Figure S2.** Selected bond distances (Å) and angles (°) in polymorph 2

| Octahedron around Zn      |            | Tetrahedron around S1, S2 and S3 |            | Within the organic moieties |            |
|---------------------------|------------|----------------------------------|------------|-----------------------------|------------|
| Zn1-OW1                   | 2.0946(3)  | S1-O11                           | 1.4761(2)  | N1A-C6A                     | 1.3502(1)  |
| Zn1-OW1 <sup>i</sup>      | 2.0946(3)  | S1-O21                           | 1.4879(2)  | N1A-C2A                     | 1.3683(1)  |
| Zn1-OW2                   | 2.1024(2)  | S1-O31                           | 1.4673(2)  | C2A-C3A                     | 1.3602(2)  |
| Zn1-OW2 <sup>i</sup>      | 2.1024(2)  | S1-O41                           | 1.4730(1)  | C2A-C7A                     | 1.4857(1)  |
| Zn1-OW3                   | 2.0591(4)  | O11-S1-O21                       | 109.518(1) | C3A-C4A                     | 1.4088(1)  |
| Zn1-OW3 <sup>i</sup>      | 2.0591(4)  | O41-S1-O21                       | 108.158(1) | C4A-C5A                     | 1.3646(1)  |
| Zn2-OW4                   | 2.0935(3)  | O31-S1-O21                       | 109.231(1) | C5A-C6A                     | 1.4034(2)  |
| Zn2-OW5                   | 2.1110(3)  | O41-S1-O11                       | 109.176(1) | C6A-N2A                     | 1.3416(1)  |
| Zn2-OW6                   | 2.0753(1)  | O31-S1-O11                       | 110.052(1) | C6A-N1A-C2A                 | 123.597(2) |
| Zn2-OW7                   | 2.0461(1)  | O31-S1-O41                       | 110.673(1) | C3A-C2A-N1A                 | 118.739(2) |
| Zn2-OW8                   | 2.1034(3)  | S2-O12                           | 1.4755(2)  | C3A-C2A-C7A                 | 124.588(2) |
| Zn2-OW9                   | 2.1036(3)  | S2-O22                           | 1.4654(2)  | N1A-C2A-C7A                 | 116.673(2) |
| OW3-Zn1-OW1 <sup>i</sup>  | 91.066(7)  | S2-O32                           | 1.4939(1)  | C2AC3A-C4A                  | 119.296(2) |
| OW3-Zn1-OW1               | 88.934(7)  | S2-O42                           | 1.4856(2)  | C5A-C4A-C3A                 | 120.940(2) |
| OW3 <sup>i</sup> -Zn1-OW2 | 87.281(7)  | O22-S2-O12                       | 110.418(1) | C4A-C5A-C6A                 | 119.043(2) |
| OW3-Zn1-OW2               | 92.719(7)  | O22-S2-O42                       | 110.389(1) | N2A-C6A-N1A                 | 118.651(2) |
| OW1 <sup>i</sup> -Zn1-OW2 | 89.042(7)  | O12-S2-O42                       | 108.868(1) | N2AC6A-C5A                  | 122.970(2) |
| OW1-Zn1-OW2               | 90.958(7)  | O22-S2-O32                       | 109.968(1) | N1A-C6A-C7A                 | 118.378(2) |
| OW3-Zn1-OW2 <sup>i</sup>  | 87.281(7)  | O12-S2-O32                       | 108.757(1) | N1B-C2B                     | 1.3579(1)  |
| OW-Zn1-OW2 <sup>i</sup>   | 89.042(78) | O42-S2-O32                       | 108.392(9) | N1B-C6B                     | 1.3711(1)  |
| OW7-Zn2-OW6               | 177.325(6) | S3-O31                           | 1.4690(2)  | C2B-N2B                     | 1.3390(8)  |
| OW7-Zn2-OW4               | 87.069(6)  | S3-O32                           | 1.4940(2)  | C2B-C3B                     | 1.3983(2)  |
| OW6-Zn2-OW4               | 90.277(6)  | S3-O33                           | 1.4825(2)  | C3B-C4B                     | 1.3744(1)  |
| OW7-Zn2-OW8               | 91.645(6)  | S3-O34                           | 1.4606(2)  | C4B-C5B                     | 1.4109(1)  |
| OW6-Zn2-OW8               | 88.768(6)  | O34-S3-O31                       | 109.88(12) | C5B-C6B                     | 1.3588(2)  |
| OW4-Zn2-OW8               | 91.638(7)  | O34-S3-O33                       | 111.00(11) | C6B-C7B                     | 1.4897(1)  |
| OW7-Zn2-OW9               | 86.426(7)  | O31-S3-O33                       | 109.36(12) | C2B-N1B-C6B                 | 123.228(2) |
| OW6-Zn2-OW9               | 96.230(6)  | O34-S3-O32                       | 109.62(11) | N2B-C2B-N1B                 | 117.806(2) |
| OW4-Zn2-OW9               | 173.478(8) | O31-S3-O32                       | 109.68(11) | N2B-C2B-C3B                 | 123.939(2) |
| OW8-Zn2-OW9               | 88.07(8)   | O33-S3-O32                       | 107.26(11) | N1B-C2B-C3B                 | 118.253(2) |
| OW7-Zn2-OW5               | 91.429(6)  |                                  |            | C4B-C3B-C2B                 | 119.567(2) |
| OW6-Zn2-OW5               | 88.315(6)  |                                  |            | C3B-C4B-C5B                 | 120.407(2) |
| OW4-Zn2-OW5               | 91.828(7)  |                                  |            | C6B-C5B-C4B                 | 119.342(2) |
| OW8-Zn2-OW5               | 175.480(7) |                                  |            | C5B-C6B-N1B                 | 119.200(2) |
| OW9-Zn2-OW5               | 88.815(7)  |                                  |            | C5B-C6B-C7B                 | 124.606(2) |
|                           |            |                                  |            | N1B-C6B-C7B                 | 116.191(2) |
|                           |            |                                  |            | N1C-C2C                     | 1.3434(1)  |
|                           |            |                                  |            | N1C-C6C                     | 1.3766(1)  |
|                           |            |                                  |            | C2C-N2C                     | 1.3388(8)  |
|                           |            |                                  |            | C2C-C3C                     | 1.4034(2)  |
|                           |            |                                  |            | C3C-C4C                     | 1.3704(1)  |
|                           |            |                                  |            | C4C-C5C                     | 1.4101(1)  |
|                           |            |                                  |            | C5C-C6C                     | 1.3541(2)  |
|                           |            |                                  |            | C6C-C7C                     | 1.4889(1)  |
|                           |            |                                  |            | C2C-N1C-C6C                 | 123.417(2) |
|                           |            |                                  |            | N2C-C2C-N1C                 | 118.691(2) |
|                           |            |                                  |            | N2C-C2C-C3C                 | 122.812(2) |
|                           |            |                                  |            | N1C-C2C-C3C                 | 118.494(2) |
|                           |            |                                  |            | C4C-C3C-C2C                 | 119.178(2) |
|                           |            |                                  |            | C3C-C4C-C5C                 | 120.575(2) |
|                           |            |                                  |            | C6C-C5C-C4C                 | 119.423(2) |
|                           |            |                                  |            | C5C-C6C-N1C                 | 118.912(2) |
|                           |            |                                  |            | C5C-C6C-C7C                 | 125.091(2) |
|                           |            |                                  |            | N1C-C6C-C7C                 | 115.990(2) |

Symmetry code: i = 1-x, 1-y, 1-z

**Figure S3.** Hydrogen bonding geometry (Å, °) for polymorph 1

| D-H...A                       | d(H...D) (Å) | d(H...A) (Å) | d(D...A) (Å) | ∠D-H...A(°) |
|-------------------------------|--------------|--------------|--------------|-------------|
| N1A-H1A...O8                  | 0.88         | 1.833        | 2.708        | 172.93      |
| N2A-H2A...O6                  | 0.87         | 2.069        | 2.947        | 176.19      |
| N2A-H2B...O7 <sup>i</sup>     | 0.88         | 2.280        | 3.156        | 173.28      |
| N1B-H1B...O3                  | 0.88         | 1.850        | 2.724        | 172.05      |
| N2B-H2C...O2                  | 0.88         | 2.088        | 2.962        | 172.27      |
| N2B-H2D...O4 <sup>ii</sup>    | 0.88         | 2.029        | 2.907        | 175.35      |
| OW1-H1W1...O6                 | 0.86         | 1.899        | 2.757        | 175.63      |
| OW1-H2W1...O2                 | 0.86         | 1.931        | 2.780        | 168.70      |
| OW2-H1W2...O1                 | 0.86         | 1.881        | 2.740        | 176.29      |
| OW2-H2W2...O7 <sup>iii</sup>  | 0.86         | 1.879        | 2.732        | 171.60      |
| OW3-H2W3...O1 <sup>ii</sup>   | 0.85         | 2.039        | 2.855        | 158.06      |
| OW4-H1W4...O2                 | 0.86         | 1.874        | 2.721        | 167.73      |
| OW5-H1W5...O5 <sup>i</sup>    | 0.86         | 1.884        | 2.715        | 162.01      |
| OW6-H1W6...O6                 | 0.86         | 2.143        | 3.002        | 178.72      |
| OW6-H1W6...O5                 | 0.86         | 2.520        | 3.039        | 119.72      |
| OW7-H1W7...O7 <sup>iv</sup>   | 0.86         | 1.852        | 2.703        | 170.23      |
| OW7-H2W7...O1 <sup>iii</sup>  | 0.86         | 1.907        | 2.752        | 167.48      |
| OW8-H1W8...O4 <sup>ii</sup>   | 0.86         | 1.889        | 2.725        | 163.61      |
| OW8-H2W8...O5                 | 0.86         | 1.966        | 2.822        | 173.50      |
| OW3-H1W3...OW7                | 0.86         | 1.869        | 2.726        | 173.86      |
| OW4-H2W4...OW8                | 0.86         | 1.857        | 2.714        | 174.24      |
| OW5-H2W5...OW7 <sup>iii</sup> | 0.86         | 1.983        | 2.798        | 157.76      |
| OW6-H2W6...OW8 <sup>v</sup>   | 0.86         | 1.944        | 2.793        | 169.16      |
| C3A-H3A...O8 <sup>i</sup>     | 0.95         | 2.50         | 3.356        | 150.6       |
| C7A-H7C...O3 <sup>vi</sup>    | 0.98         | 2.60         | 3.232        | 122.5       |
| C3B-H3B...O3 <sup>ii</sup>    | 0.95         | 2.63         | 3.473        | 148.5       |
| C7B-H7E...O8 <sup>vii</sup>   | 0.98         | 2.65         | 3.374        | 130.5       |
| C5A-H5A...OW2 <sup>viii</sup> | 0.95         | 2.63         | 3.358        | 133.9       |
| C5A-H5A...OW3 <sup>viii</sup> | 0.95         | 2.56         | 3.453        | 157.4       |
| C5B-H5B...OW4 <sup>ix</sup>   | 0.95         | 2.48         | 3.343        | 151.0       |

Symmetry code: i = x-1, y, z; ii = x+1, y, z; iii = -x+1, -y+1, -z+1; iv = -x+2, -y+1, -z+1; v = -x+1, -y+1, -z; vi = x+1, y+1, z; vii = x-1, y-1, z; viii = x, y+1, z; ix = -x, -y, -z.

**Figure S4.** Hydrogen bonding geometry (Å, °) for polymorph 2

| D-H...A                         | d(H...D) (Å) | d(H...A) (Å) | d(D...A) (Å) | ∠D-H...A(°) |
|---------------------------------|--------------|--------------|--------------|-------------|
| N1A-H1A...O31                   | 0.88         | 1.86         | 2.739        | 175.0       |
| N2A-H2A1...O11                  | 0.88         | 2.08         | 2.955        | 170.4       |
| N2A-H2A2...O12 <sup>i</sup>     | 0.88         | 2.22         | 3.088        | 171.0       |
| N1B-H1B...O22                   | 0.88         | 1.85         | 2.729        | 172.7       |
| N2B-H2B1...O24                  | 0.88         | 2.127        | 2.997        | 169.6       |
| N2B-H2B2...O21 <sup>i</sup>     | 0.88         | 2.01         | 2.878        | 171.2       |
| N1C-H1C...O34                   | 0.88         | 1.83         | 2.703        | 169.0       |
| N2C-H2C1...O32                  | 0.88         | 2.06         | 2.932        | 170.5       |
| N2C-H2C2...O31 <sup>ii</sup>    | 0.88         | 2.00         | 2.878        | 177.4       |
| O1W-H1W2...O11                  | 0.86         | 2.52         | 3.348        | 161.1       |
| O1W-H1W2...O14                  | 0.86         | 2.27         | 2.928        | 133.2       |
| O3W-H3W2...O32 <sup>iii</sup>   | 0.86         | 1.88         | 2.712        | 163.2       |
| O4W-H4W1...O32                  | 0.86         | 1.92         | 2.776        | 174.7       |
| O4W-H4W2...O12                  | 0.86         | 1.89         | 2.749        | 173.1       |
| O5W-H5W2...O23 <sup>iv</sup>    | 0.86         | 1.89         | 2.838        | 162.1       |
| O6W-H6W1...O32                  | 0.86         | 1.90         | 2.748        | 167.7       |
| O6W-H6W2...O11                  | 0.86         | 1.87         | 2.731        | 178.0       |
| O7W-H7W2...O24                  | 0.86         | 1.89         | 2.741        | 168.4       |
| O8W-H8W1...O33 <sup>v</sup>     | 0.86         | 2.09         | 2.870        | 151.4       |
| O9W-H9W1...O33                  | 0.86         | 1.98         | 2.805        | 161.0       |
| O9W-H9W2...O24 <sup>vi</sup>    | 0.86         | 2.11         | 2.954        | 166.0       |
| O11W-H1...O33                   | 0.86         | 1.96         | 2.792        | 161.8       |
| O9W-H9W2...O24 <sup>vi</sup>    | 0.86         | 2.11         | 2.954        | 166.0       |
| O11W-H1...O33                   | 0.86         | 1.96         | 2.792        | 161.8       |
| O11W-H2...O12 <sup>i</sup>      | 0.86         | 1.86         | 2.711        | 173.2       |
| O12W-H3...O23 <sup>i</sup>      | 0.86         | 1.99         | 2.797        | 156.7       |
| O12W-H4...O21 <sup>iv</sup>     | 0.86         | 1.84         | 2.688        | 168.4       |
| O13W-H5...O14 <sup>iv</sup>     | 0.86         | 1.94         | 2.795        | 169.9       |
| O13W-H6...O31                   | 0.86         | 1.87         | 2.700        | 160.9       |
| O1W-H1W1...O13W <sup>iii</sup>  | 0.86         | 1.95         | 2.790        | 166.6       |
| O2W-H2W1...O11W <sup>iii</sup>  | 0.86         | 2.00         | 2.809        | 155.6       |
| O3W-H3W1...O13W <sup>vii</sup>  | 0.86         | 1.87         | 2.721        | 171.9       |
| O5W-H5W1...O11W                 | 0.86         | 1.90         | 2.753        | 174.0       |
| O7W-H7W1...O12W <sup>viii</sup> | 0.86         | 1.89         | 2.721        | 161.4       |
| O8W-H8W2...O12W <sup>ii</sup>   | 0.86         | 1.86         | 2.718        | 172.6       |
| C3A-H3A...O3W <sup>iii</sup>    | 0.95         | 2.53         | 3.387        | 149.9       |
| C5A-H5A...O32 <sup>iv</sup>     | 0.95         | 2.55         | 3.410        | 151.1       |

Symmetry code: i = x+1, y, z; ii = x-1, y, z; iii = -x+1, -y+1, -z+1; iv = x+1, y, z; v = x-1, y, z; vi = -x, -y+1, -z+2; vii = -x+2, -y+1, -z+1; viii = -x+1, -y+1, -z+2; ix = -x+1, -y+2, -z+1.
